# Supplementary material for: Precooling and percooling (cooling during exercise) both improve performance in the heat: a meta-analytical review
Source: HighWire-hosted journal article supplement (doi:10.1136/bjsports-2013-092928), 2014-04-19
Supplement: bjsports-2013-092928supp_table.pdf [file bjsports-2013-092928supp_table.pdf]

**Supplementary table 1. Overview of study characteristics**

| <b>Study</b>                | <b>Exercise protocol</b>                                                                    | <b>Type of Cooling</b> | <b>Method of Cooling</b>                                                                                                           | <b>Change in exercise performance</b>                                                                                                                                                             | <b>Change in temperature</b>                                                                        | <b>Ambient conditions</b>                          | <b>Conclusion</b>                                                                                           |
|-----------------------------|---------------------------------------------------------------------------------------------|------------------------|------------------------------------------------------------------------------------------------------------------------------------|---------------------------------------------------------------------------------------------------------------------------------------------------------------------------------------------------|-----------------------------------------------------------------------------------------------------|----------------------------------------------------|-------------------------------------------------------------------------------------------------------------|
| Arngrimsson et al. 2004(11) | 5-km running time trial                                                                     | Precooling             | Cooling vest during warm-up                                                                                                        | 1.3% improvement in time trial performance                                                                                                                                                        | Trec 0.2°C↓<br>Tskin 1.8°C↓                                                                         | 32°C<br>50% rh                                     | Cooling vest improved 5-km run performance                                                                  |
| Burdon et al. 2013(43)      | 90 minute steady state exercise (60% of VO <sub>2</sub> max), 4 kJ/kg self-paced time trial | Precooling             | Ice slurry ingestion (-1°C), 25 gr every 5 minutes during steady state exercise                                                    | 10.5% improvement in time trial performance                                                                                                                                                       | No differences in Tc or Tskin                                                                       | 32°C<br>40% rh                                     | Ice slurry ingestion improved exercise performance                                                          |
| Byrne et al. 2011(37)       | Self-paced 30 min cycling time trial                                                        | Precooling             | Cold water ingestion (2°C) 3x300 ml                                                                                                | 2.8% improvement in covered distance                                                                                                                                                              | Reduced Trec until 25 minutes of exercise                                                           | 32°C<br>60% rh                                     | Precooling enhances exercise performance                                                                    |
| Castle et al. 2006(18)      | Intermittent cycling sprints: Twenty 2-min periods                                          | Precooling             | 20 min of cooling with:<br>(a) Ice vest (10.7°C)<br>(b) Cold water immersion (17.8°C)<br>(c) Ice packs covering upper legs (-16°C) | Increased peak power output for last sprint over penultimate<br>No differences in peak power output or work done<br>4% increase in peak power output and an improved work done during each sprint | Reduced Tskin until sprint 4<br>Reduced Tskin during whole protocol<br>Reduced Tskin until sprint 4 | 34°C<br>52% rh<br>34°C<br>52% rh<br>34°C<br>52% rh | Leg cooling offering a more ergogenic effect on the peak power output than upper body or whole body cooling |
| Cotter et al. 2000(19)      | 20 min cycling (65% of VO <sub>2</sub> max), 15 min self-paced time trial                   | Precooling             | Ice vest and cold air exposure (3°C)                                                                                               | 16% improvement in mean power output                                                                                                                                                              | Trec 0.5°C↓                                                                                         | 35°C<br>60% rh                                     | Precooling improved endurance exercise performance                                                          |
| Duffield et al 2003(20)     | 80 minute intermittent, repeat sprint cycling exercise                                      | Precooling             | Ice cooling jacket (5 min before exercise) and during recovery periods                                                             | No improvement of performance                                                                                                                                                                     | No differences in Tc and Tskin                                                                      | 30°C<br>60% rh                                     | Ice vest cooling did not improve performance                                                                |

| Study                   | Exercise protocol                                                                                                                         | Type of Cooling         | Method of Cooling                                                                                         | Change in exercise performance                                                                                                             | Change in temperature                                                                                                           | Ambient conditions               | Conclusion                                                                |
|-------------------------|-------------------------------------------------------------------------------------------------------------------------------------------|-------------------------|-----------------------------------------------------------------------------------------------------------|--------------------------------------------------------------------------------------------------------------------------------------------|---------------------------------------------------------------------------------------------------------------------------------|----------------------------------|---------------------------------------------------------------------------|
| Siegel et al. 2012(31)  | Running until exhaustion at first ventilator threshold                                                                                    | Precooling              | 30 min of cooling with:<br>(a) 7.5 g/kg of ice slurry ingestion (-1°C)<br>(b) Cold water immersion (24°C) | 12.8% improvement in time to exhaustion<br>21.6% improvement in time to exhaustion                                                         | Trec 0.43°C ↓ prior to exercise<br>Trec 0.25°C ↓ prior to exercise                                                              | 34°C<br>55% rh<br>34°C<br>55% rh | Ice ingestion and cold water immersion increased total time to exhaustion |
| Skein et al. 2012 (41)  | 50 min intermittent sprint exercise                                                                                                       | Precooling              | Cold water immersion (10°C)                                                                               | No difference in total distance covered                                                                                                    | Mean Tc 0.57°C ↓ during exercise                                                                                                | 31°C<br>33% rh                   | Precooling did not improve performance                                    |
| Stanley et al. 2010(32) | 75 min cycling at 60% of peak power output + 0.75x30 min performance trial                                                                | Precooling              | 1 liter in 50 min of -0.8°C ice or 18.4°C fluid                                                           | No changes in performance time trial                                                                                                       | Tc 0.4°C ↓ prior to exercise                                                                                                    | 34°C<br>60% rh                   | No effects of precooling on exercise performance                          |
| Stevens et al. 2013(42) | Simulated Olympic distance triathlon (self-paced 10 km running time trial)                                                                | Precooling              | Ice slurry ingestion (< 1°C)                                                                              | 2.5% improvement in 10 km time trial finishing time                                                                                        | Lower intragastric temperature till 1.5 km                                                                                      | 34°C<br>25% rh                   | Ice slurry ingestion improved 10 km running performance                   |
| Tyler et al. 2010(35)   | <b>Study A:</b> 75 min running 60% of VO <sub>2</sub> max and a 15 min self-paced time trial<br><b>Study B:</b> 15 min running time trial | Cooling during exercise | Neck collar (-80°C, left in ambient conditions for 5 min before use)                                      | <b>Study A:</b> 5.9% improvement of covered distance during time trial<br><b>Study B:</b> no difference in distance covered between trials | <b>Study A:</b> no difference in neck T <sub>skin</sub><br><b>Study B:</b> Neck T <sub>skin</sub> is lower in cooling condition | 30°C<br>50% rh<br>30°C<br>50% rh | Cooling the neck can improve exercise performance in a hot environment.   |
| Tyler et al. 2011a(33)  | 90 min preloaded running trial (75 min 60% of VO <sub>2</sub> max and 15 min self-paced)                                                  | Cooling during exercise | Neck collar (-80°C, left in ambient conditions for 10 min before use)                                     | 7.0% improvement in time trial performance                                                                                                 | Neck temperature is reduced by wearing a neck collar                                                                            | 30°C<br>53% rh                   | Neck cooling improved time trial performance                              |
| Tyler et al. 2011b(34)  | Running at 70% of VO <sub>2</sub> until exhaustion                                                                                        | Cooling during exercise | Neck collar (-80°C, left in ambient conditions for 5 min before use)                                      | 13.5% improvement of exercise time until exhaustion                                                                                        | Neck T <sub>skin</sub> is reduced<br>Trec = 0.43 ↑                                                                              | 32°C<br>53% rh                   | Cooling the neck increased the time until exhaustion                      |

| <b>Study</b>           | <b>Exercise protocol</b> | <b>Type of Cooling</b> | <b>Method of Cooling</b>        | <b>Change in exercise performance</b> | <b>Change in temperature</b>                                            | <b>Ambient conditions</b> | <b>Conclusion</b>                       |
|------------------------|--------------------------|------------------------|---------------------------------|---------------------------------------|-------------------------------------------------------------------------|---------------------------|-----------------------------------------|
| Ückert et al. 2007(36) | Incremental running test | Precooling             | Cooling vest (0-5°C) for 20 min | 7.3% improvement in running time      | T <sub>c</sub> and T <sub>skin</sub> 0.2°C and 0.8°C↓ at start exercise | 30-32°C<br>50% rh         | Precooling improved running performance |

**T<sub>c</sub>** = core body temperature; **T<sub>skin</sub>** = skin temperature; **T<sub>rec</sub>** = rectal temperature; **T<sub>tymp</sub>** = tympanic temperature; **T<sub>eso</sub>** = esophageal temperature; **VO<sub>2</sub> max** = maximal oxygen consumption; **rh** = relative humidity
